# Supplementary material for: A Large Genome-Wide Association Study of Age-Related Hearing Impairment Using Electronic Health Records
Source: PubMed Central journal article supplement (PMC5072625; doi:10.1371/journal.pgen.1006371), 2016-10-20

**S2 Fig. Results at previously-identified Mendelian hearing loss genes.** SNPs between the start and end of the gene colored in blue, nonsynonymous coding changes in red, other exonic SNPs in orange, eQTL SNPs in green.

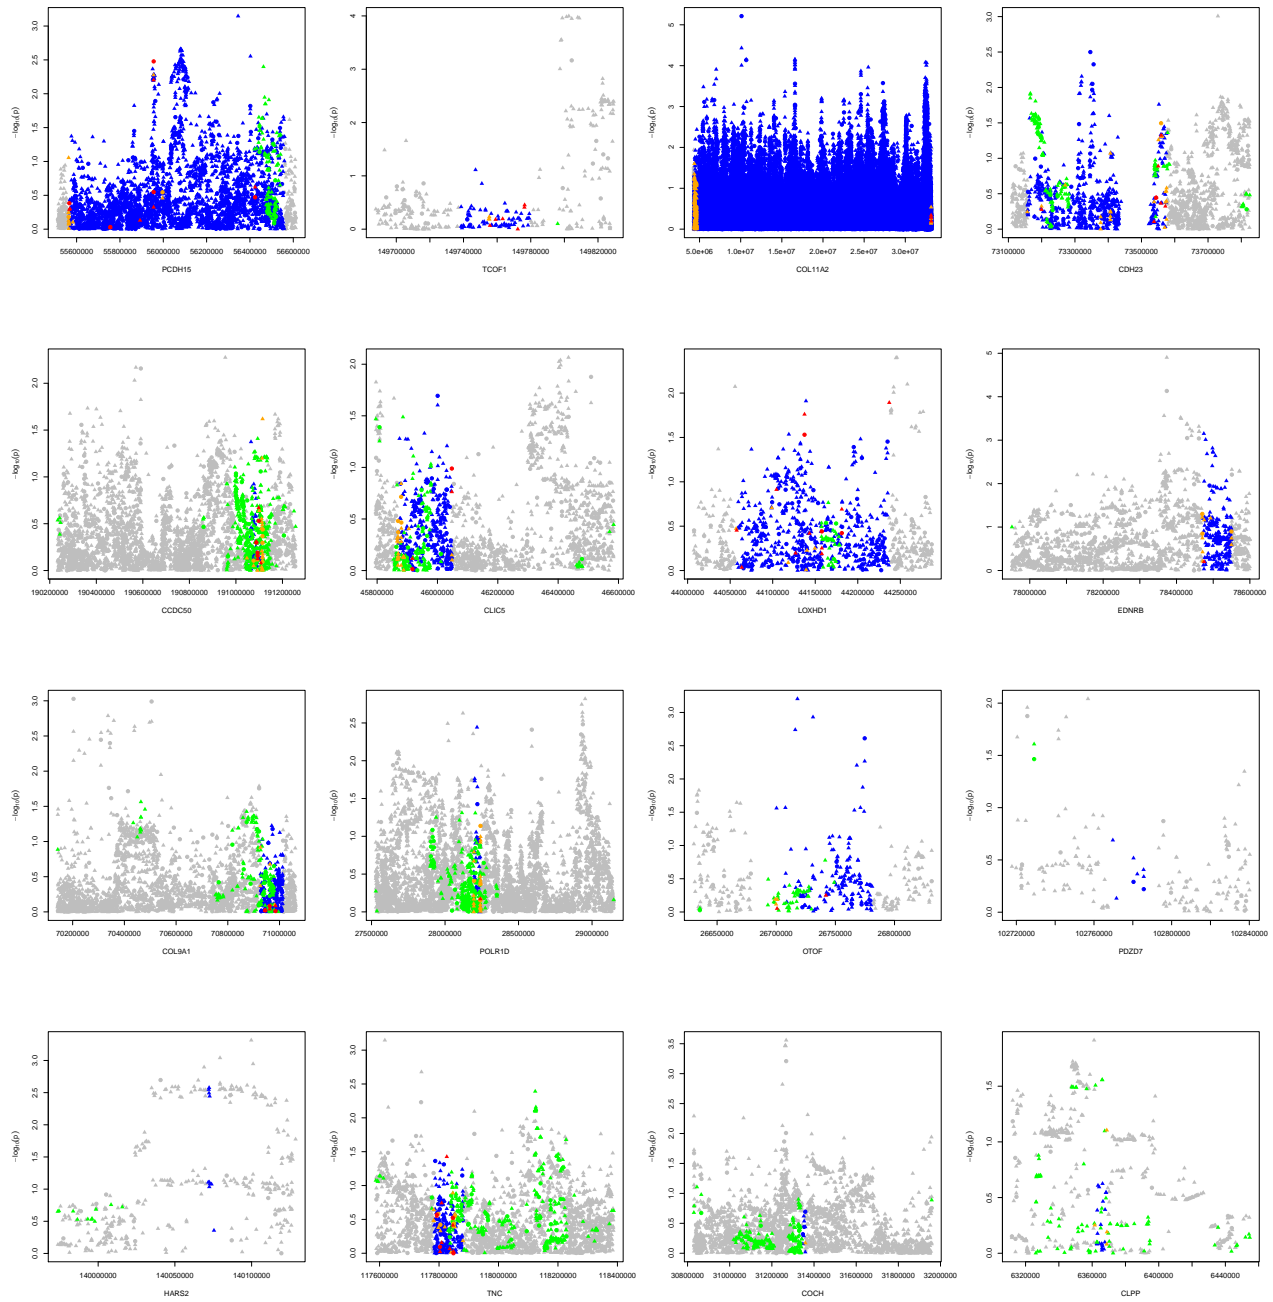

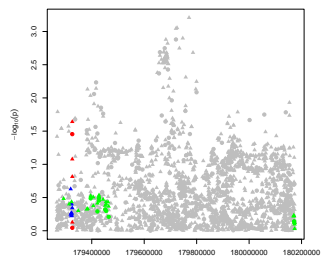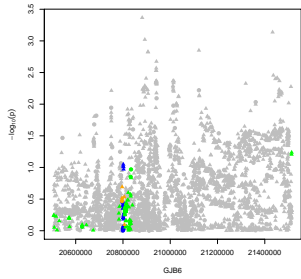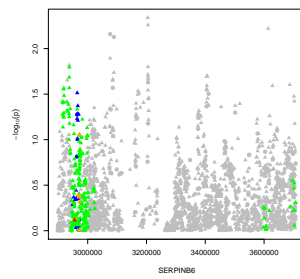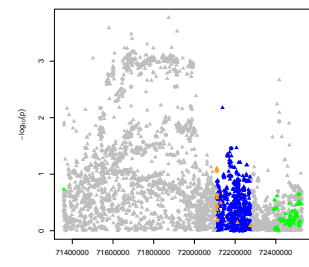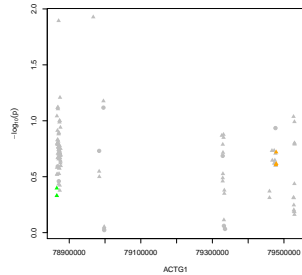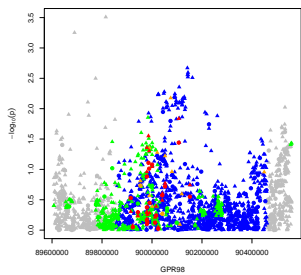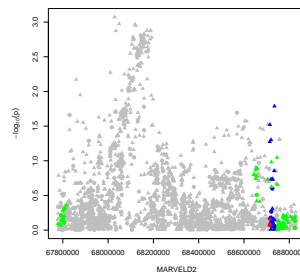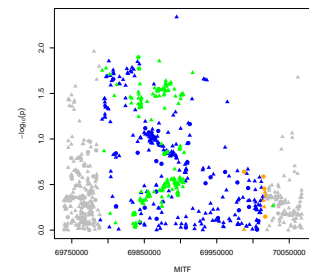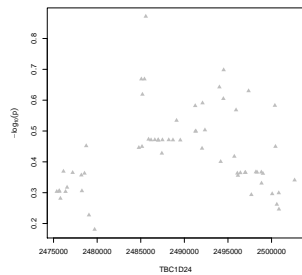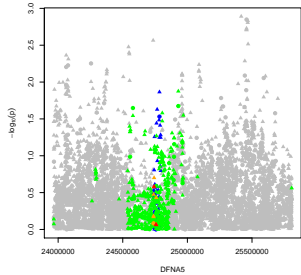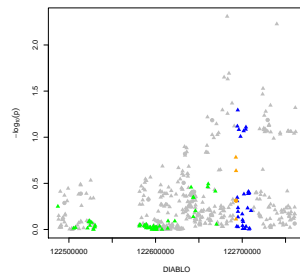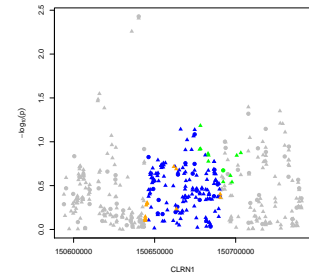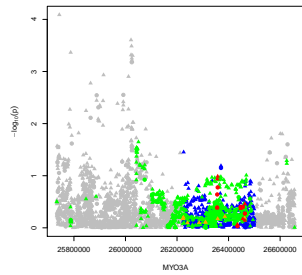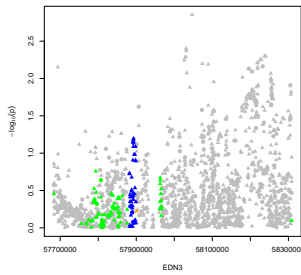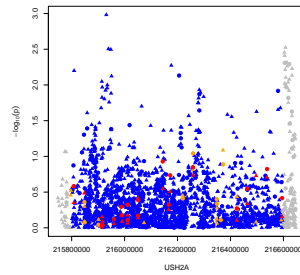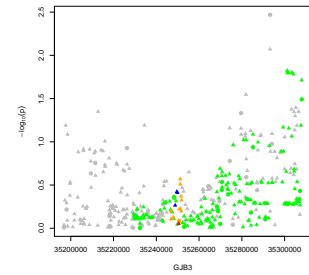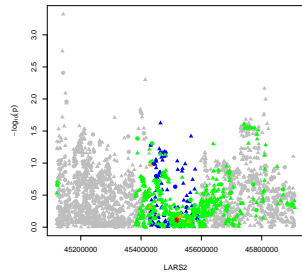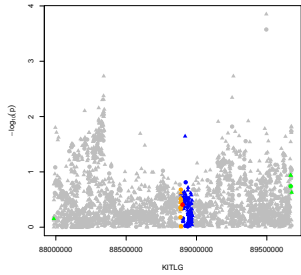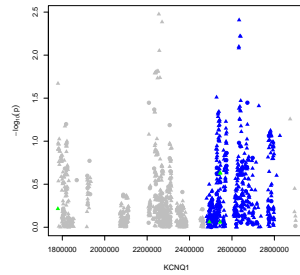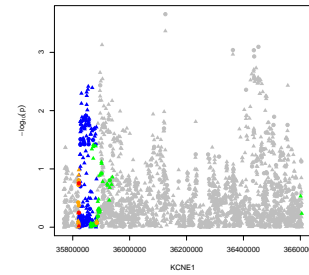

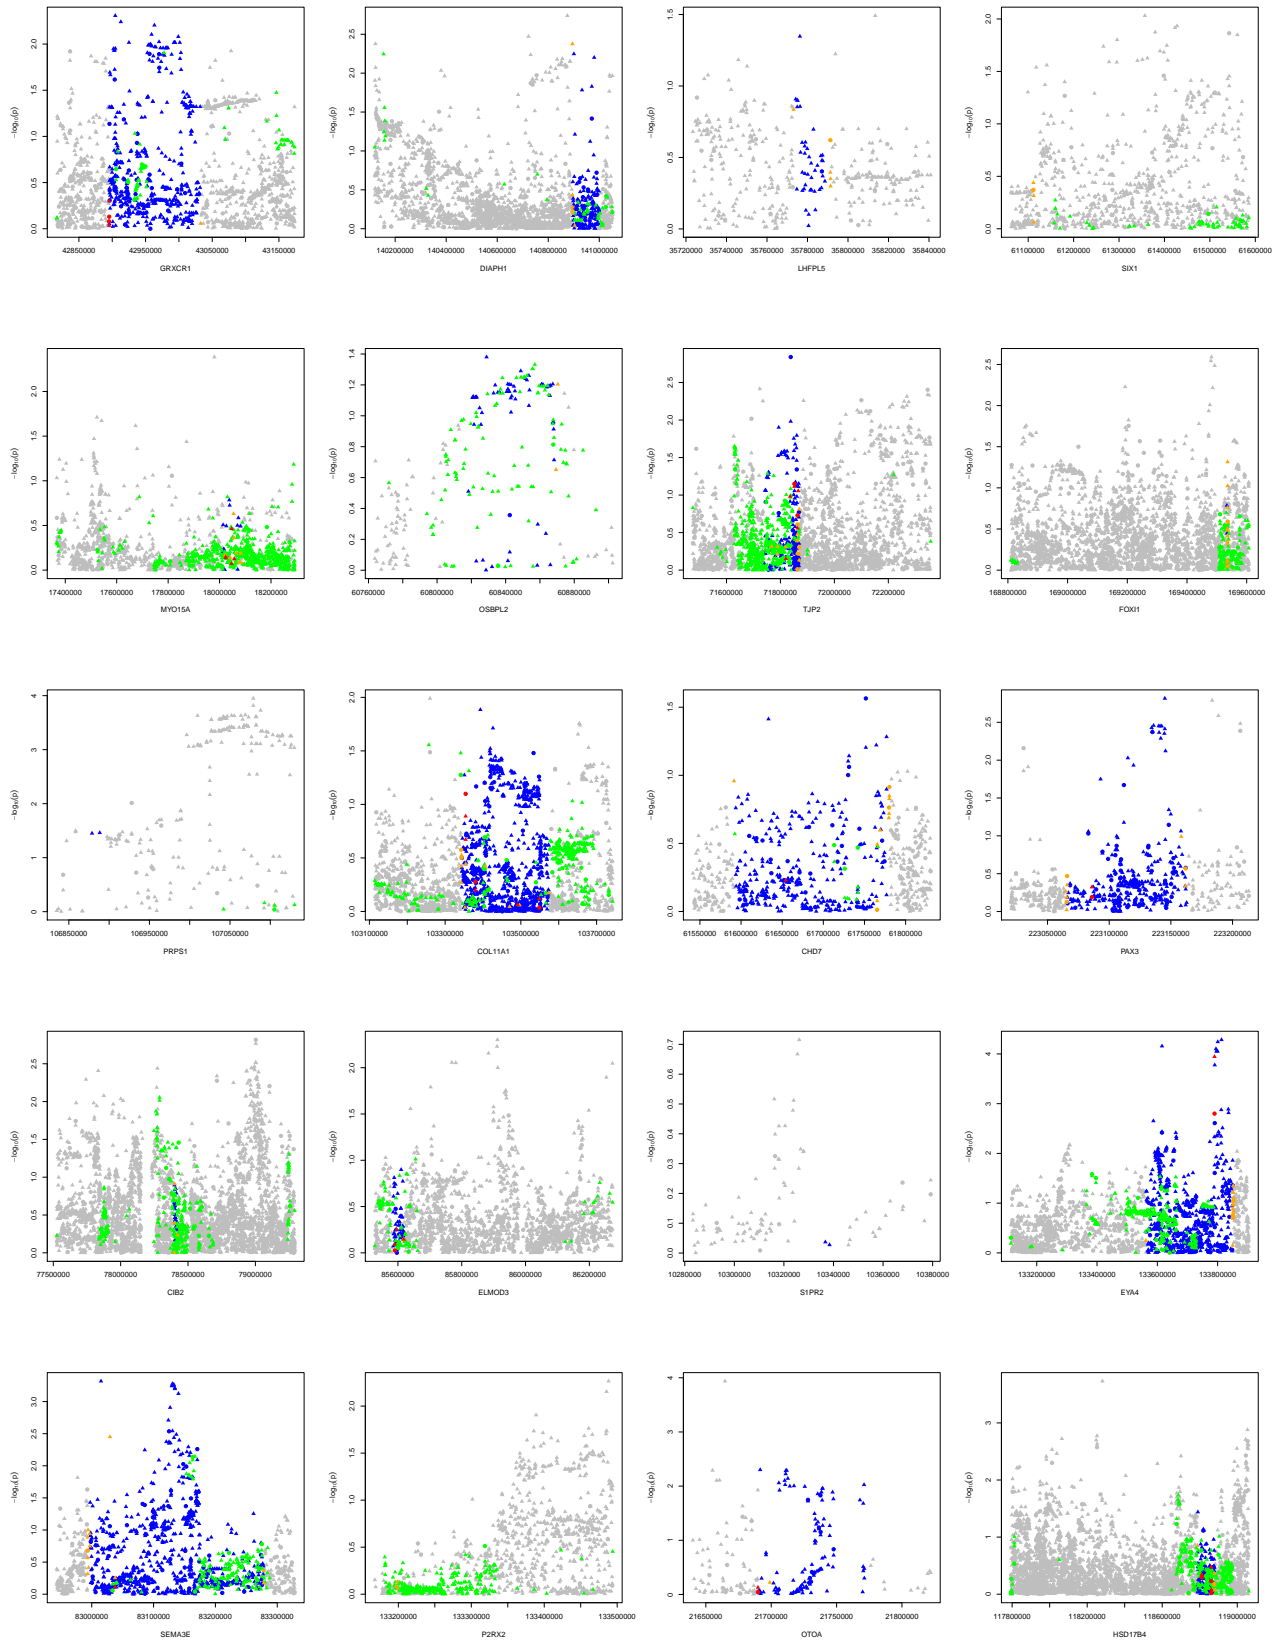

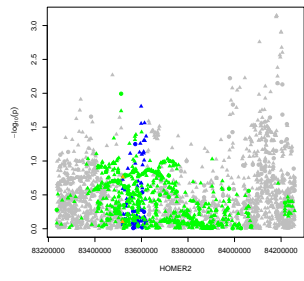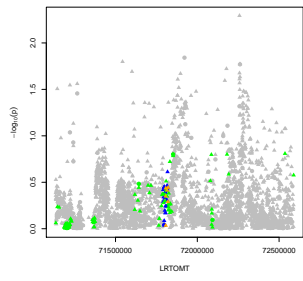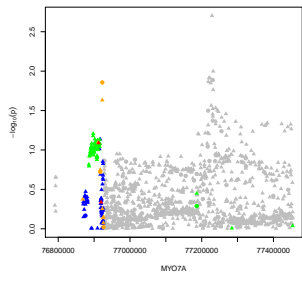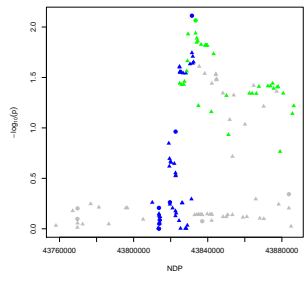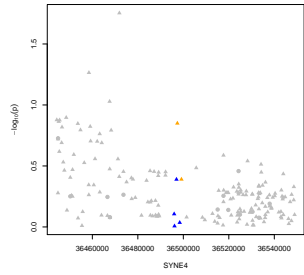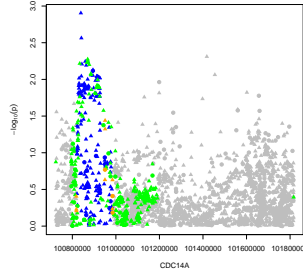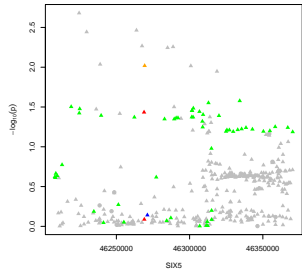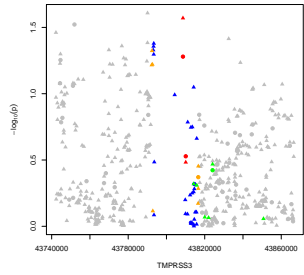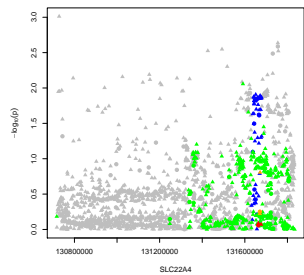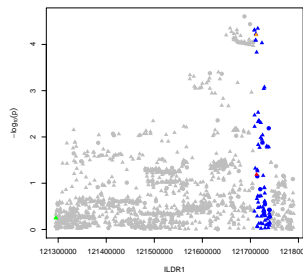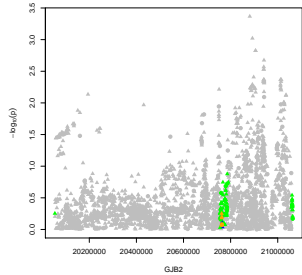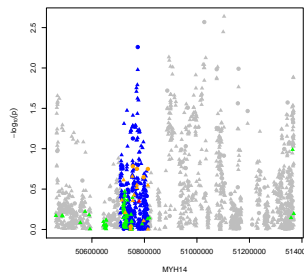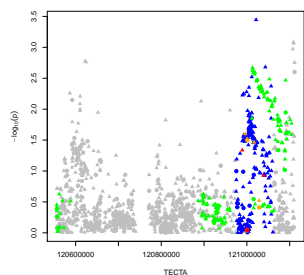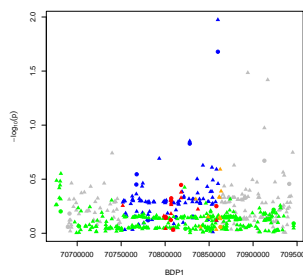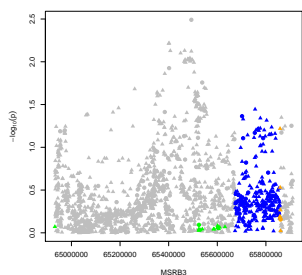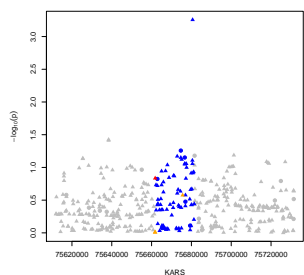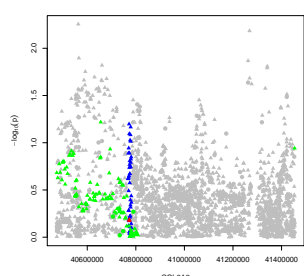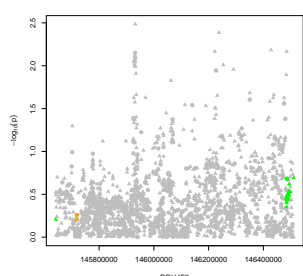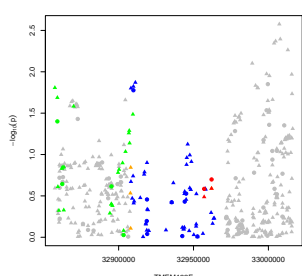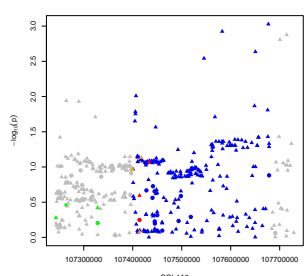

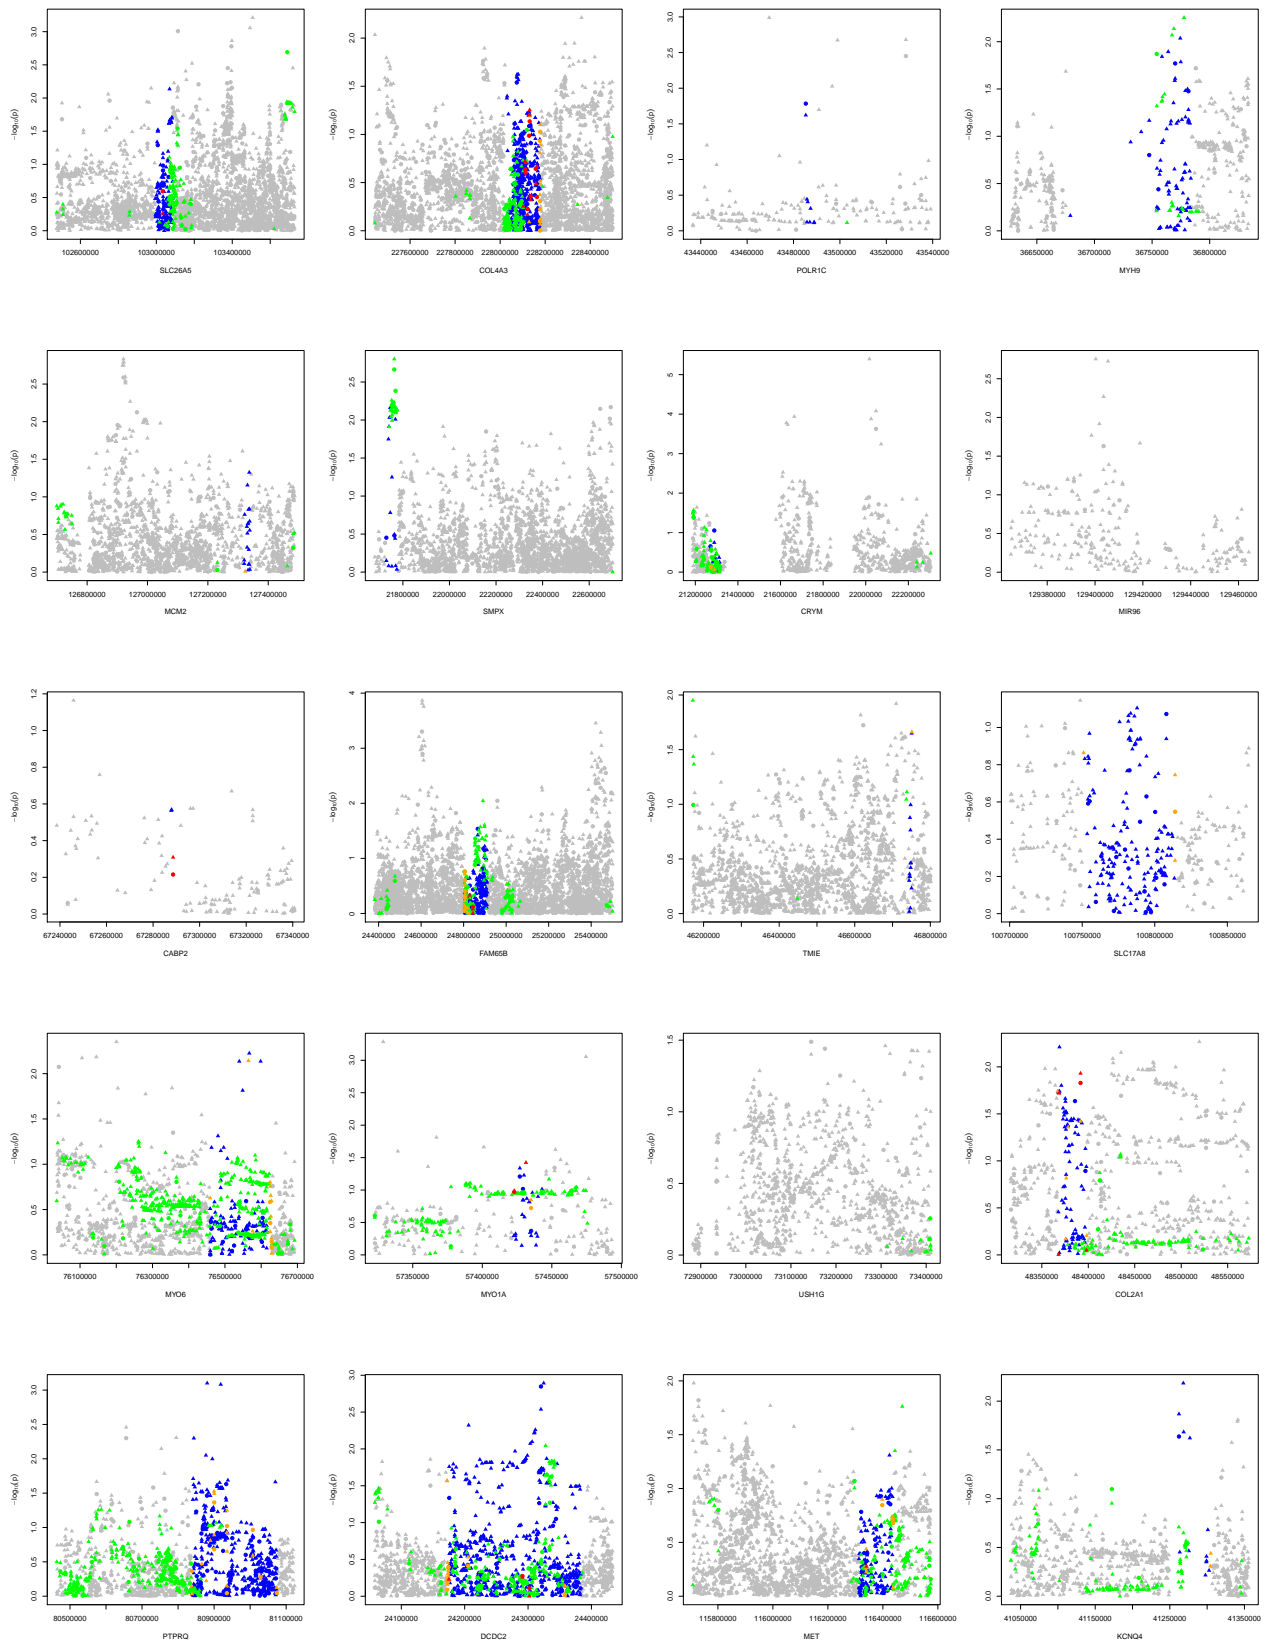

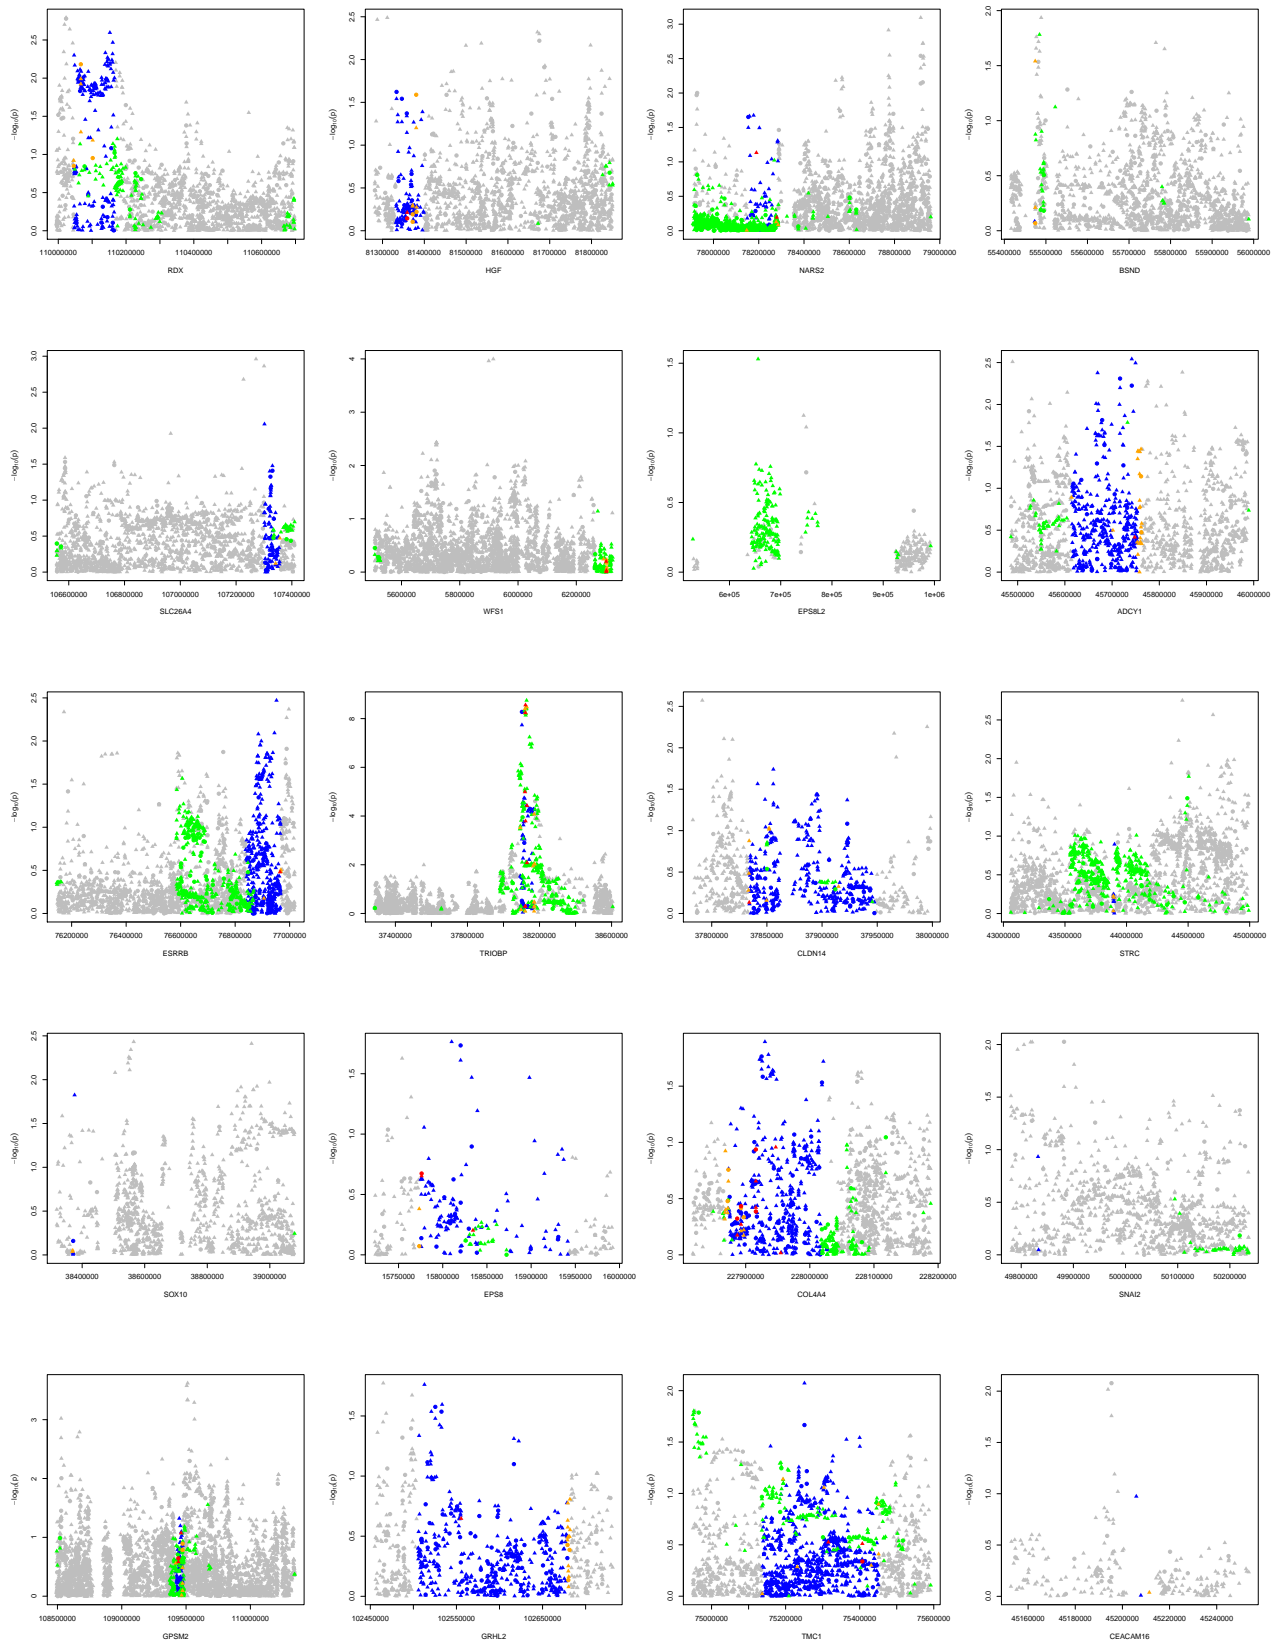

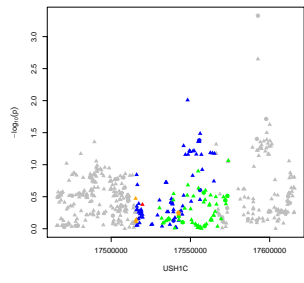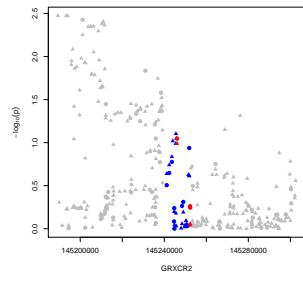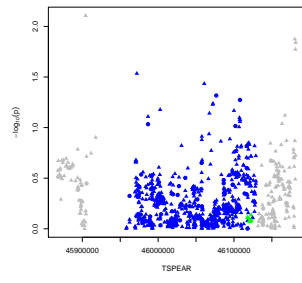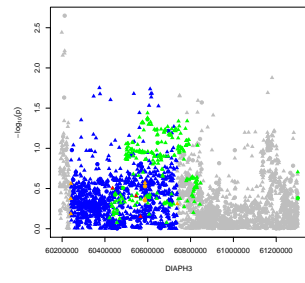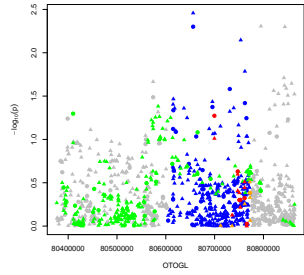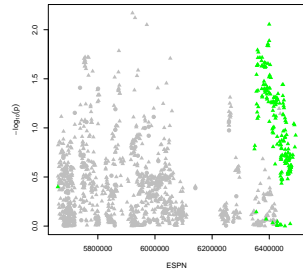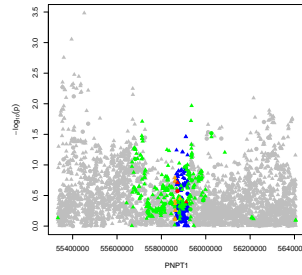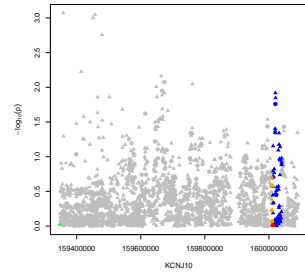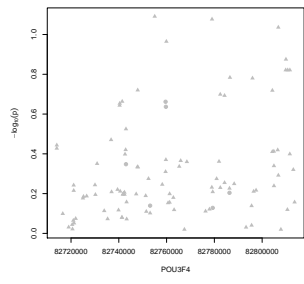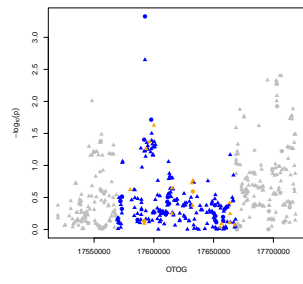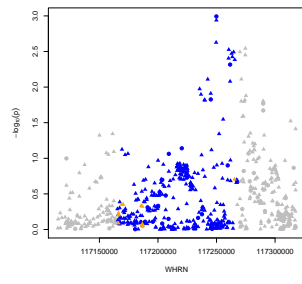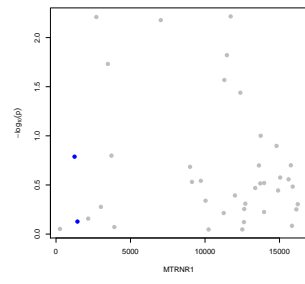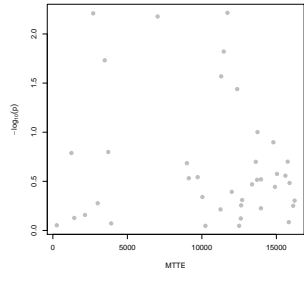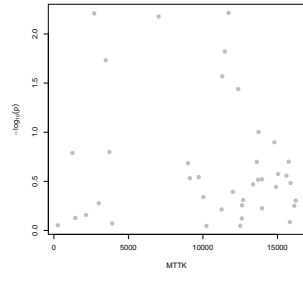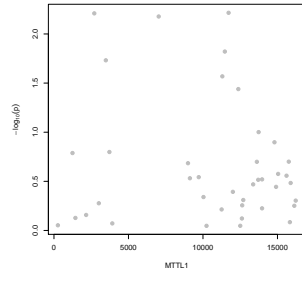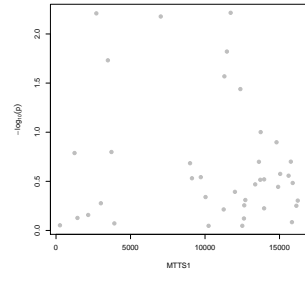

Supplement: pgen.1006371.s003.pdf [file pgen.1006371.s003.pdf]
