# Supplementary material for: A Large Genome-Wide Association Study of Age-Related Hearing Impairment Using Electronic Health Records
Source: PubMed Central journal article supplement (PMC5072625; doi:10.1371/journal.pgen.1006371), 2016-10-20
Supplement: pgen.1006371.s001.pdf [file pgen.1006371.s001.pdf]

**S1 Table. Results at previously-identified GWAS sub-threshold SNPs in GERA.** Previously-identified results were largely based on hearing threshold principal components, which are not directly comparable to the results here.

| Study                         | SNP         | Chr | Pos       | Allele | non-Hispanic white |       | Latino |        | East Asian |        | African American |       | Meta-analysis |       |                |
|-------------------------------|-------------|-----|-----------|--------|--------------------|-------|--------|--------|------------|--------|------------------|-------|---------------|-------|----------------|
|                               |             |     |           |        | HR                 | P     | HR     | P      | HR         | P      | HR               | P     | HR            | P     | I <sup>2</sup> |
| Giroto et al., PC2            | rs6669265   | 1   | 27361219  | A/G    | 1.016              | 0.47  | 0.923  | 0.33   | 1.259      | 0.23   | 1.099            | 0.62  | 1.013         | 0.53  | 0.0            |
| Giroto et al., PC3            | rs621215    | 1   | 99619424  | A/G    | 0.994              | 0.76  | 0.989  | 0.88   | 0.908      | 0.27   | 1.080            | 0.54  | 0.991         | 0.64  | 0.0            |
| Giroto et al., PC3            | rs712932    | 1   | 99651500  | C/G    | 0.982              | 0.4   | 0.913  | 0.22   | 0.898      | 0.22   | 1.266            | 0.06  | 0.979         | 0.28  | 50.7           |
| Giroto et al., PC3            | rs112931    | 1   | 99654168  | T/G    | 0.982              | 0.4   | 0.913  | 0.22   | 0.898      | 0.22   | 1.266            | 0.06  | 0.979         | 0.28  | 50.7           |
| Giroto et al., PC3            | rs11485142  | 1   | 218833214 | C/A    | 0.992              | 0.71  | 0.922  | 0.36   | 0.789      | 0.54   | 0.791            | 0.17  | 0.983         | 0.43  | 0.0            |
| Giroto et al., PC1            | rs6742663   | 2   | 20395160  | G/A    | 1.021              | 0.35  | 1.073  | 0.34   | 1.030      | 0.75   | 1.185            | 0.18  | 1.029         | 0.16  | 0.0            |
| Giroto et al., PC1            | rs6544887   | 2   | 46577212  | C/T    | 0.993              | 0.7   | 1.023  | 0.75   | 0.860      | 0.15   | 0.962            | 0.78  | 0.990         | 0.57  | 0.0            |
| Giroto et al., PC1            | rs6544889   | 2   | 46577299  | A/G    | 0.991              | 0.65  | 1.026  | 0.73   | 0.889      | 0.27   | 0.915            | 0.56  | 0.989         | 0.54  | 0.0            |
| Giroto et al., PC2            | rs17864603  | 2   | 51989400  | C/T    | 1.008              | 0.94  | 1.101  | 0.82   | 0.000      | 0.45   | 1.902            | 0.6   | 1.018         | 0.86  | 0.0            |
| Giroto et al., PC3            | rs6756828   | 2   | 174919189 | T/C    | 1.012              | 0.59  | 0.968  | 0.67   | 0.921      | 0.32   | 0.994            | 0.97  | 1.003         | 0.89  | 0.0            |
| Friedman et al., case/control | rs11928865  | 3   | 7155702   | A/T    | 1.007              | 0.76  | 0.954  | 0.61   | 0.930      | 0.48   | 1.141            | 0.33  | 1.004         | 0.85  | 0.0            |
| Friedman et al., case/control | rs779701    | 3   | 7518772   | G/A    | 0.994              | 0.79  | 0.938  | 0.42   | 0.880      | 0.12   | 1.073            | 0.61  | 0.985         | 0.45  | 0.0            |
| Friedman et al., case/control | rs779706    | 3   | 7524042   | C/G    | 0.995              | 0.81  | 0.977  | 0.76   | 0.874      | 0.099  | 1.201            | 0.16  | 0.990         | 0.63  | 35.1           |
| Giroto et al., PC2            | rs2276957   | 4   | 122261475 | C/T    | 0.943              | 0.042 | 0.955  | 0.57   | 1.042      | 0.59   | 0.832            | 0.43  | 0.953         | 0.059 | 0.0            |
| Fransen et al., PC2           | rs1494630   | 5   | 63394170  | A/G    | 0.962              | 0.35  | 1.207  | 0.3    | 1.145      | 0.83   | 1.102            | 0.58  | 0.980         | 0.61  | 0.0            |
| Van Laer et al., PC3          | rs457717    | 5   | 75920972  | G/A    | 0.997              | 0.87  | 1.117  | 0.12   | 0.948      | 0.49   | 1.165            | 0.25  | 1.005         | 0.8   | 28.1           |
| Fransen et al., PC3           | rs116439186 | 6   | 29943067  | A/G    | 1.024              | 0.26  | 1.186  | 0.025  | 1.273      | 0.0038 | 1.086            | 0.59  | 1.048         | 0.018 | 67.7           |
| Fransen et al., PC1           | rs528808    | 6   | 100104289 | G/A    | 0.959              | 0.078 | 0.852  | 0.092  | 0.697      | 0.086  | 0.989            | 0.97  | 0.949         | 0.022 | 18.2           |
| Fransen et al., PC1           | rs6910580   | 6   | 110243292 | C/T    | 0.981              | 0.34  | 1.110  | 0.15   | 1.127      | 0.15   | 0.914            | 0.5   | 0.995         | 0.77  | 45.4           |
| Fransen et al., PC1           | rs78236468  | 6   | 121088770 | G/T    | 1.009              | 0.84  | 0.847  | 0.19   | 0.990      | 0.94   | 0.474            | 0.25  | 0.987         | 0.74  | 0.4            |
| Van Laer et al., PC2          | rs10499138  | 6   | 128492182 | T/A    | 1.524              | 0.051 | 2.819  | 0.0014 | 1.184      | 0.33   | 0.646            | 0.18  | 1.321         | 0.017 | 72.9           |
| Fransen et al., PC1           | rs7786410   | 7   | 55922323  | G/A    | 0.974              | 0.44  | 1.069  | 0.46   | 1.007      | 0.93   | 0.942            | 0.67  | 0.986         | 0.63  | 0.0            |
| Fransen et al., PC3           | rs62459614  | 7   | 70587145  | C/T    | 0.982              | 0.8   | 1.186  | 0.094  | 0.969      | 0.69   | 1.016            | 0.96  | 1.018         | 0.7   | 0.0            |
| Fransen et al., PC3           | rs62459619  | 7   | 70598935  | T/C    | 0.993              | 0.92  | 1.181  | 0.099  | 0.951      | 0.54   | 0.899            | 0.76  | 1.015         | 0.76  | 3.8            |
| Giroto et al., PC1            | rs2687481   | 7   | 125869122 | T/G    | 1.023              | 0.36  | 0.995  | 0.95   | 0.966      | 0.7    | 0.996            | 0.97  | 1.017         | 0.46  | 0.0            |
| Fransen et al., PC3           | rs17170356  | 7   | 146887868 | G/A    | 1.103              | 0.037 | 0.787  | 0.23   | 0.950      | 0.64   | 0.866            | 0.7   | 1.060         | 0.17  | 29.1           |
| Fransen et al., PC1           | rs7816613   | 8   | 102729475 | C/T    | 0.982              | 0.55  | 1.125  | 0.3    | 0.965      | 0.8    | 1.078            | 0.62  | 0.993         | 0.8   | 0.0            |
| Fransen et al., PC1           | rs1460237   | 8   | 105841855 | A/T    | 0.978              | 0.75  | 0.883  | 0.61   | 0.905      | 0.92   | 3.519            | 0.37  | 0.974         | 0.68  | 0.0            |
| Giroto et al., PC3            | rs305256    | 8   | 137568252 | C/T    | 1.002              | 0.94  | 1.001  | 0.99   | 1.070      | 0.47   | 1.040            | 0.81  | 1.006         | 0.78  | 0.0            |
| Giroto et al., PC2            | rs17292288  | 9   | 129058500 | T/C    | 1.001              | 0.98  | 1.070  | 0.42   | 0.840      | 0.1    | 0.699            | 0.05  | 0.993         | 0.75  | 57.4           |
| Fransen et al., PC1           | rs9329289   | 10  | 2542389   | G/A    | 0.996              | 0.82  | 1.025  | 0.73   | 1.258      | 0.046  | 1.127            | 0.36  | 1.007         | 0.72  | 38.7           |
| Giroto et al., PC1            | rs6585804   | 10  | 123980108 | A/G    | 0.965              | 0.073 | 1.089  | 0.25   | 0.852      | 0.14   | 1.049            | 0.71  | 0.971         | 0.11  | 30.8           |
| Giroto et al., PC1            | rs6585747   | 11  | 79700145  | G/A    | 0.992              | 0.7   | 0.859  | 0.037  | 1.044      | 0.6    | 1.062            | 0.64  | 0.987         | 0.48  | 33.3           |
| Giroto et al., PC3            | rs7123014   | 11  | 85922442  | A/G    | 0.993              | 0.71  | 0.934  | 0.34   | 1.179      | 0.032  | 1.023            | 0.87  | 0.999         | 0.96  | 46.9           |
| Giroto et al., PC1            | rs3765620   | 11  | 102595492 | A/G    | 1.020              | 0.3   | 1.008  | 0.91   | 0.987      | 0.87   | 1.113            | 0.46  | 1.019         | 0.29  | 0.0            |
| Giroto et al., PC2            | rs11219981  | 11  | 125109627 | A/G    | 0.968              | 0.16  | 0.980  | 0.84   | 0.949      | 0.57   | 0.911            | 0.72  | 0.967         | 0.13  | 0.0            |
| Fransen et al., PC2           | rs10876222  | 12  | 52362479  | A/T    | 0.967              | 0.13  | 1.001  | 0.99   | 0.891      | 0.17   | 1.122            | 0.41  | 0.968         | 0.11  | 0.0            |
| Fransen et al., PC2           | rs2252518   | 12  | 52381026  | A/C    | 0.964              | 0.097 | 0.995  | 0.94   | 0.902      | 0.22   | 1.134            | 0.33  | 0.966         | 0.094 | 0.0            |
| Giroto et al., PC1            | rs10848114  | 12  | 130979355 | T/C    | 0.999              | 0.97  | 1.055  | 0.45   | 1.088      | 0.34   | 0.937            | 0.61  | 1.006         | 0.76  | 0.0            |
| Giroto et al., PC2            | rs11842701  | 13  | 60431689  | A/T    | 1.105              | 0.22  | 1.395  | 0.33   | 0.895      | 0.48   | 0.365            | 0.38  | 1.065         | 0.37  | 0.0            |
| Giroto et al., PC2            | rs3783041   | 13  | 60588891  | A/T    | 1.096              | 0.26  | 1.373  | 0.35   | 0.870      | 0.36   | 0.803            | 0.84  | 1.053         | 0.46  | 0.0            |
| Giroto et al., PC1            | rs17687720  | 13  | 102611999 | C/A    | 1.057              | 0.084 | 0.968  | 0.72   | 0.814      | 0.13   | 0.923            | 0.73  | 1.033         | 0.27  | 29.8           |
| Giroto et al., PC3            | rs10130121  | 14  | 36624751  | T/G    | 1.055              | 0.11  | 0.841  | 0.24   | 2.355      | 0.049  | 0.887            | 0.54  | 1.043         | 0.19  | 53.4           |
| Giroto et al., PC3            | rs17461837  | 14  | 36644330  | T/C    | 1.057              | 0.1   | 0.823  | 0.19   | 2.424      | 0.037  | 0.903            | 0.6   | 1.045         | 0.18  | 57.9           |
| Giroto et al., PC1            | rs978091    | 14  | 43344558  | G/A    | 1.039              | 0.17  | 1.009  | 0.91   | 1.074      | 0.42   | 1.168            | 0.22  | 1.044         | 0.084 | 0.0            |
| Giroto et al., PC2            | rs1952587   | 14  | 57161217  | A/T    | 1.020              | 0.35  | 1.092  | 0.23   | 0.963      | 0.64   | 0.673            | 0.015 | 1.015         | 0.44  | 62.0           |
| Giroto et al., PC2            | rs928108    | 14  | 57170474  | G/A    | 1.038              | 0.079 | 1.022  | 0.75   | 0.859      | 0.052  | 0.753            | 0.077 | 1.020         | 0.32  | 67.0           |
| Giroto et al., PC1            | rs7182802   | 15  | 27347206  | T/C    | 1.010              | 0.67  | 1.043  | 0.63   | 1.036      | 0.65   | 1.167            | 0.27  | 1.018         | 0.42  | 0.0            |
| Giroto et al., PC1            | rs17705835  | 15  | 93662283  | T/C    | 1.028              | 0.47  | 0.894  | 0.41   | 1.203      | 0.055  | 1.905            | 0.05  | 1.047         | 0.19  | 57.0           |
| Giroto et al., PC2            | rs7212433   | 17  | 30083687  | C/T    | 1.002              | 0.9   | 1.055  | 0.47   | 0.950      | 0.62   | 0.998            | 0.99  | 1.004         | 0.83  | 0.0            |
| Giroto et al., PC1            | rs1036987   | 17  | 74892171  | T/A    | 1.016              | 0.69  | 0.859  | 0.14   | 1.108      | 0.43   | 1.050            | 0.73  | 1.006         | 0.87  | 0.4            |
| Fransen et al., PC3           | rs12955474  | 18  | 57152038  | C/T    | 0.982              | 0.66  | 0.999  | 0.99   | 1.035      | 0.66   | 0.799            | 0.45  | 0.991         | 0.8   | 0.0            |
| Giroto et al., PC3            | rs594821    | 18  | 76745589  | T/C    | 1.013              | 0.74  | 0.956  | 0.76   | 1.400      | 0.015  | 0.755            | 0.14  | 1.021         | 0.56  | 61.8           |
| Fransen et al., PC1           | rs55655041  | 19  | 30995200  | C/T    | 1.011              | 0.69  | 0.941  | 0.6    | 0.929      | 0.81   | 1.190            | 0.37  | 1.009         | 0.71  | 0.0            |
| Giroto et al., PC1            | rs11671149  | 19  | 54170468  | C/T    | 0.917              | 0.34  | 1.652  | 0.058  | 4.248      | 0.039  | 1.525            | 0.6   | 1.002         | 0.98  | 66.9           |
| Fransen et al., PC2           | rs16989760  | 22  | 31951808  | G/A    | 0.994              | 0.88  | 0.923  | 0.7    | 0.807      | 0.55   | 0.739            | 0.29  | 0.982         | 0.66  | 0.0            |
| Fransen et al., PC2           | rs62240516  | 22  | 32135582  | C/T    | 0.994              | 0.92  | 1.238  | 0.36   | 0.895      | 0.83   | 0.903            | 0.87  | 1.004         | 0.95  | 0.0            |
| Fransen et al., PC2           | rs62238885  | 22  | 32138138  | A/G    | 0.994              | 0.91  | 1.248  | 0.34   | 0.894      | 0.83   | 0.805            | 0.73  | 1.003         | 0.95  | 0.0            |
