# Supplementary material for: A Large Genome-Wide Association Study of Age-Related Hearing Impairment Using Electronic Health Records
Source: PubMed Central journal article supplement (PMC5072625; doi:10.1371/journal.pgen.1006371), 2016-10-20

**S3 Fig. Age of onset distributions in GERA non-Hispanic white cases.** Age of onset distributions for the ARHI variants in GERA non-Hispanic whites, based on residuals and normalized to a female without diabetes, hypertension, or osteoporosis.

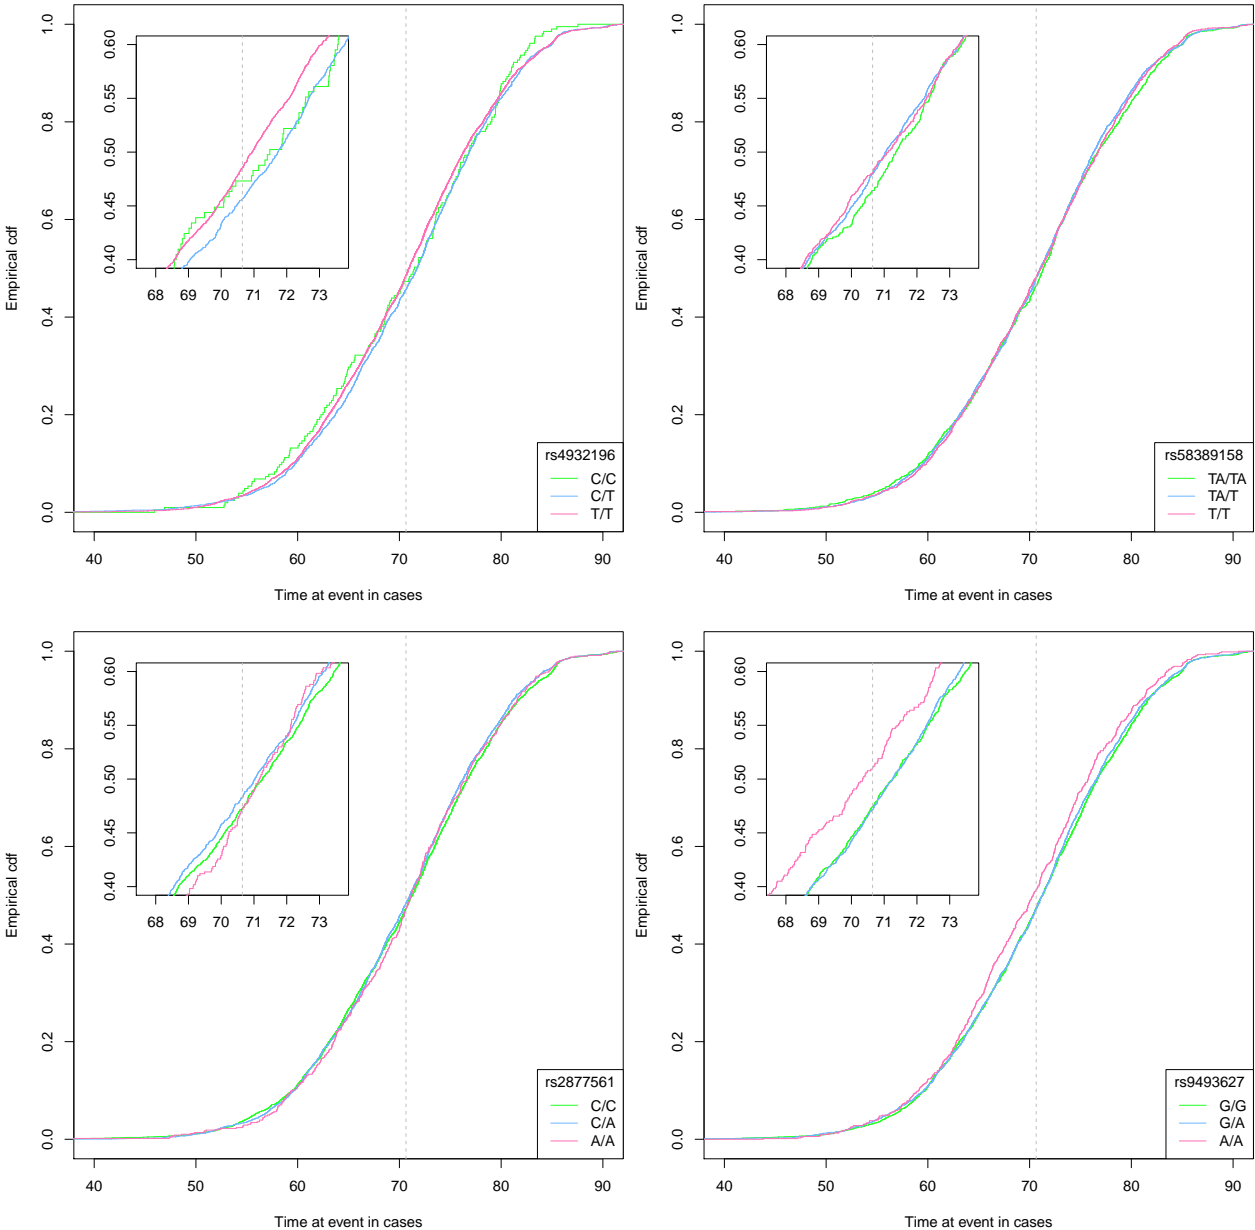

Supplement: pgen.1006371.s004.pdf [file pgen.1006371.s004.pdf]
