# Supplementary material for: A Large Genome-Wide Association Study of Age-Related Hearing Impairment Using Electronic Health Records
Source: PubMed Central journal article supplement (PMC5072625; doi:10.1371/journal.pgen.1006371), 2016-10-20

**S4 Fig. Mouse tissue expression of *ACAN* and *ISG20*.** FACS, fluorescence-activated cell sorting hair cells. E represents embryonic tissue, P postnatal. Numbers represent number of days.

*ACAN* FACS

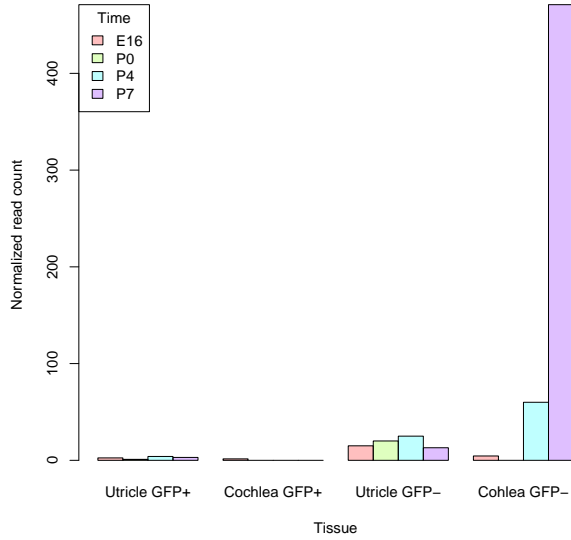

*ISG20* FACS

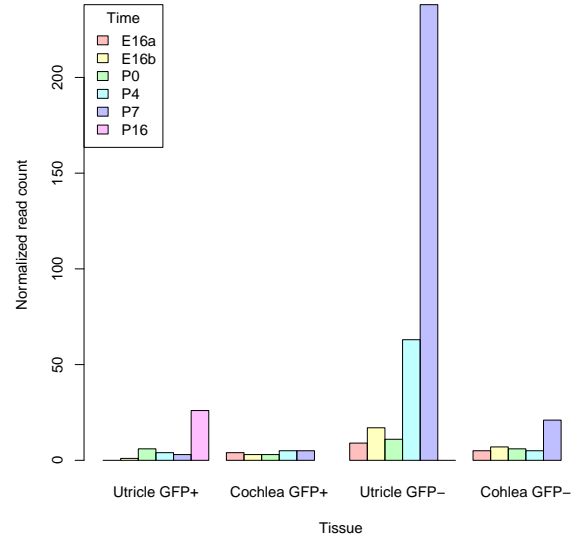

*ACAN* Ganglion

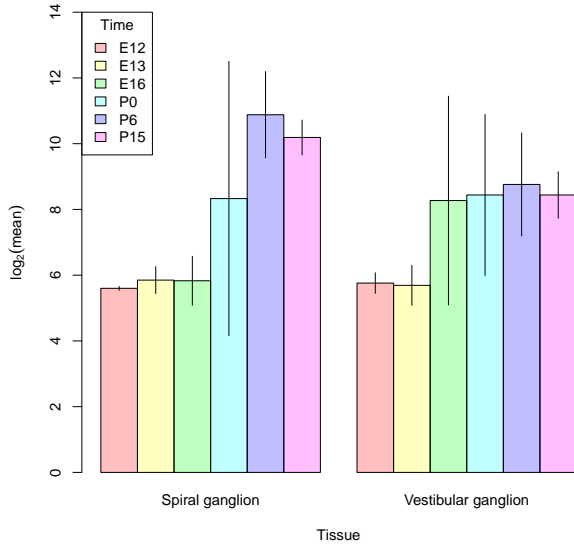

*ISG20* Ganglion

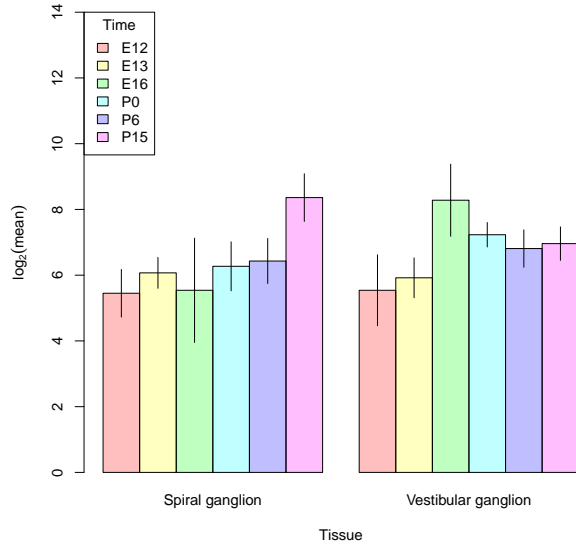

Supplement: pgen.1006371.s005.pdf [file pgen.1006371.s005.pdf]
